# Supplementary material
Source: publisher figshare collection journal article supplement (https://frontiersin.figshare.com/ndownloader/files/34305323)
Supplement: Supplementary file [file 34305323]

## Supplementary Material

### 1. Supplementary Figures

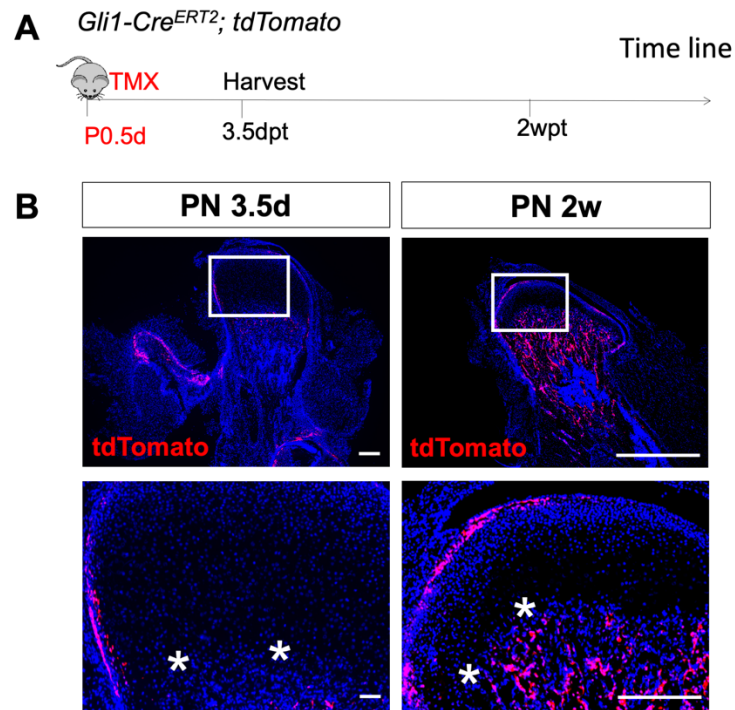

**Figure S1. The migration of Gli1+ progeny cells during condylar postnatal development.**

(A) *Gli1-Cre<sup>ERT2</sup>;tdTomato* mice were induced by tamoxifen at PN 0.5d, and the sample were harvested 3 days post- tamoxifen (3.5dpt) and 2 week post- tamoxifen (2wpt).

(B) tdTomato immunostaining of condyles from *Gli1-Cre<sup>ERT2</sup>;tdTomato* mice 3 days and 2 weeks after tamoxifen induction at PN 0.5d.

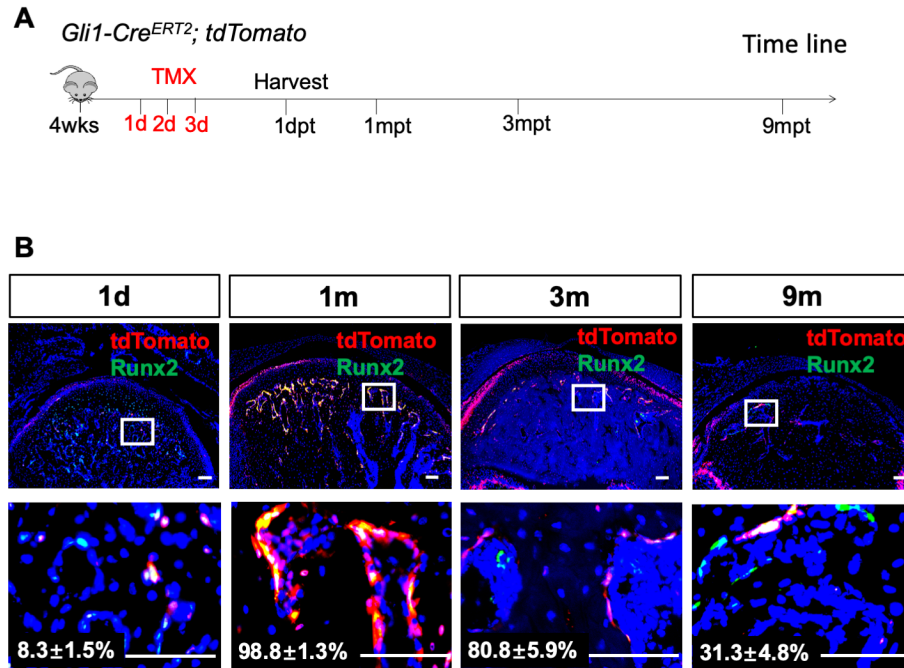

**Figure S2. Gli1+ progenitor cells contribute to the osteoblast lineage during condylar adaptive remodeling.**

(A) *Gli1-Cre<sup>ERT2</sup>;tdTomato* mice were induced by tamoxifen at 1 month of age for 3 consecutive days. The samples were collected 1day post- tamoxifen (1dpt), 1month post- tamoxifen (1mpt), 3months post- tamoxifen (3mpt), and 9months post- tamoxifen (9mpt).

(B) Runx2 and tdTomato double-immunostaining of condyles from *Gli1-Cre<sup>ERT2</sup>;tdTomato* mice 1day post- tamoxifen (1dpt), 1month post- tamoxifen (1mpt), 3months post- tamoxifen (3mpt), and 9months post- tamoxifen (9mpt). (M) presents a high-magnification image of the inset in (I).

The lower panel represent high-magnification images of the insets in upper panel. All data are presented as mean  $\pm$  SD,  $n = 4$ . Scale bars, 100  $\mu$ m.

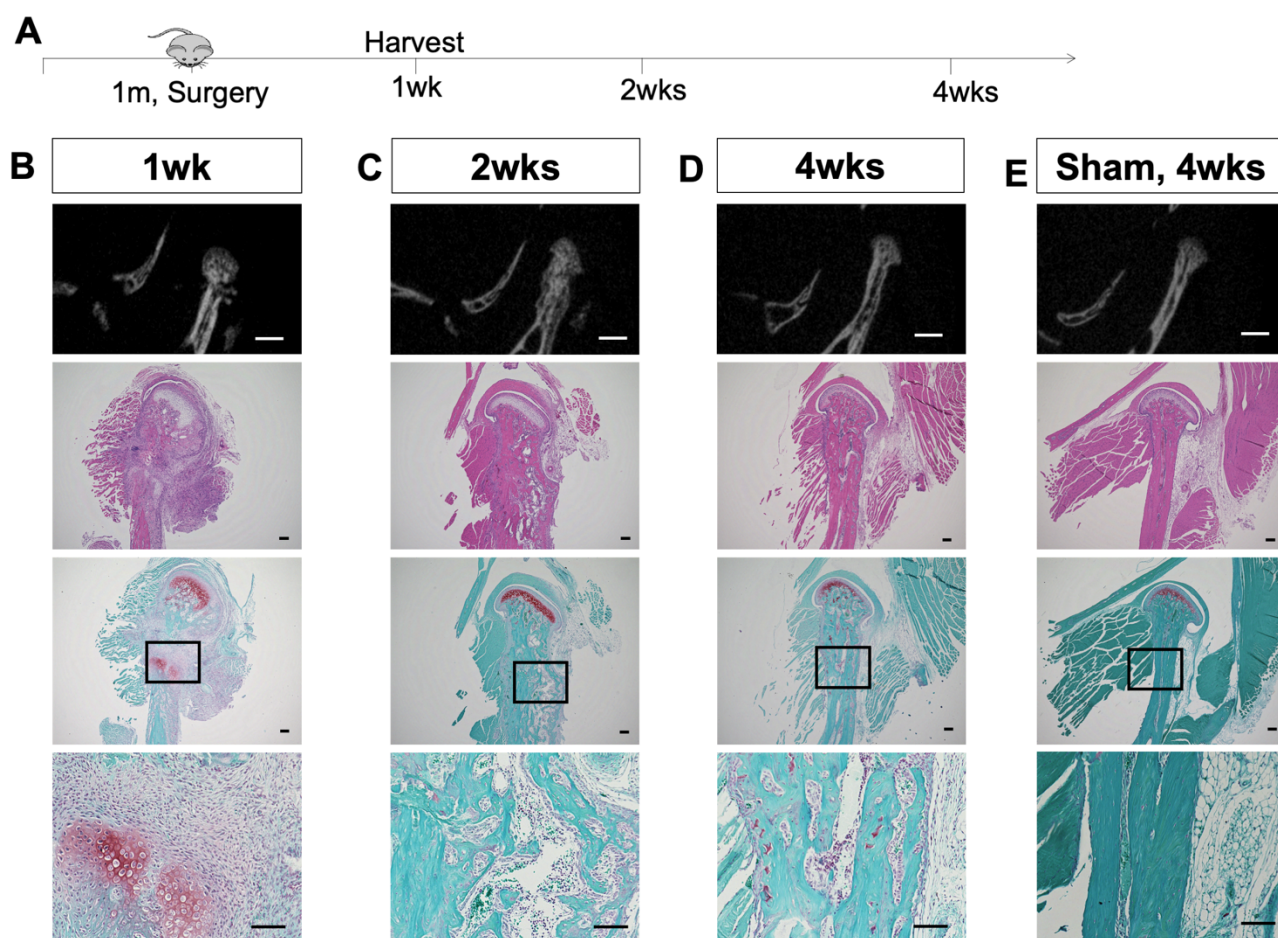

**Figure S3. Healing process of condylar fracture.**

(A) The surgery was performed at 1 month of age, and the samples were collected 1 week, 2 weeks and 4 weeks after surgery.

(B) Micro-CT imaging and H&E, Safranin O, and fast green staining results obtained 1 week after condylar fracture.

(C) Micro-CT imaging and H&E, Safranin O, and fast green staining results obtained 2 weeks after condylar fracture.

(D) Micro-CT imaging and H&E, Safranin O, and fast green staining results obtained 4 weeks after condylar fracture.

(E) Micro-CT imaging and H&E, Safranin O, and fast green staining results obtained 4 weeks after sham surgery.

Scale bars in Micro-CT are 600  $\mu\text{m}$ ; others, 100  $\mu\text{m}$ .

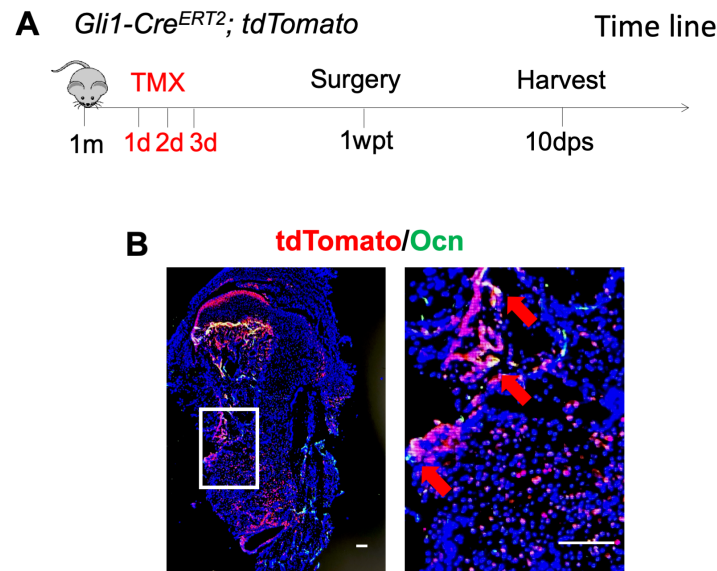

**Figure S4. Gli1+ osteogenic progenitors contribute to Ocn+ osteoblasts during condylar fracture repair.**

(A) *Gli1-Cre<sup>ERT2</sup>;tdTomato* mice were induced by tamoxifen at 1 month of age for 3 consecutive days. The surgery was performed 1week post- tamoxifen (1wpt), and the samples were collected 10 days post-surgery (10 dps).

(B) Ocn and tdTomato double-immunostaining of condyles from *Gli1-Cre<sup>ERT2</sup>;tdTomato* mice 10 days after surgery. Red arrows point to the overlap between Ocn and tdTomato signals.

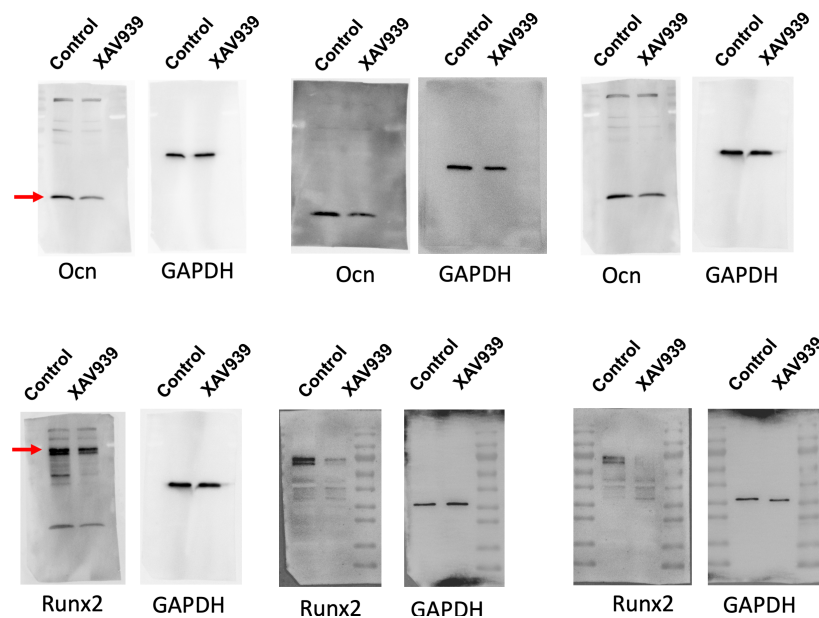

**Figure S5. The uncropped images of Runx2 and Ocn Western blot analysis.**

Red arrows point to the target proteins.
